# Supplementary material
Source: publisher figshare collection journal article supplement (https://sage.figshare.com/ndownloader/files/13316477)
Supplement: Supplementary file 1 [file 13316477]

Archive with 4 entries (4 files):
- Table S1.pdf
- Table S2.pdf
- Table S3.pdf
- Table S4.pdf
